# Supplementary figures and images for: The endosperm-specificZHOUPIgene ofArabidopsis thalianaregulates endosperm breakdown and embryonic epidermal development
Source: Oxford University Press journal article supplement (doi:10.1242/dev.026708), 2008-10-10

**A**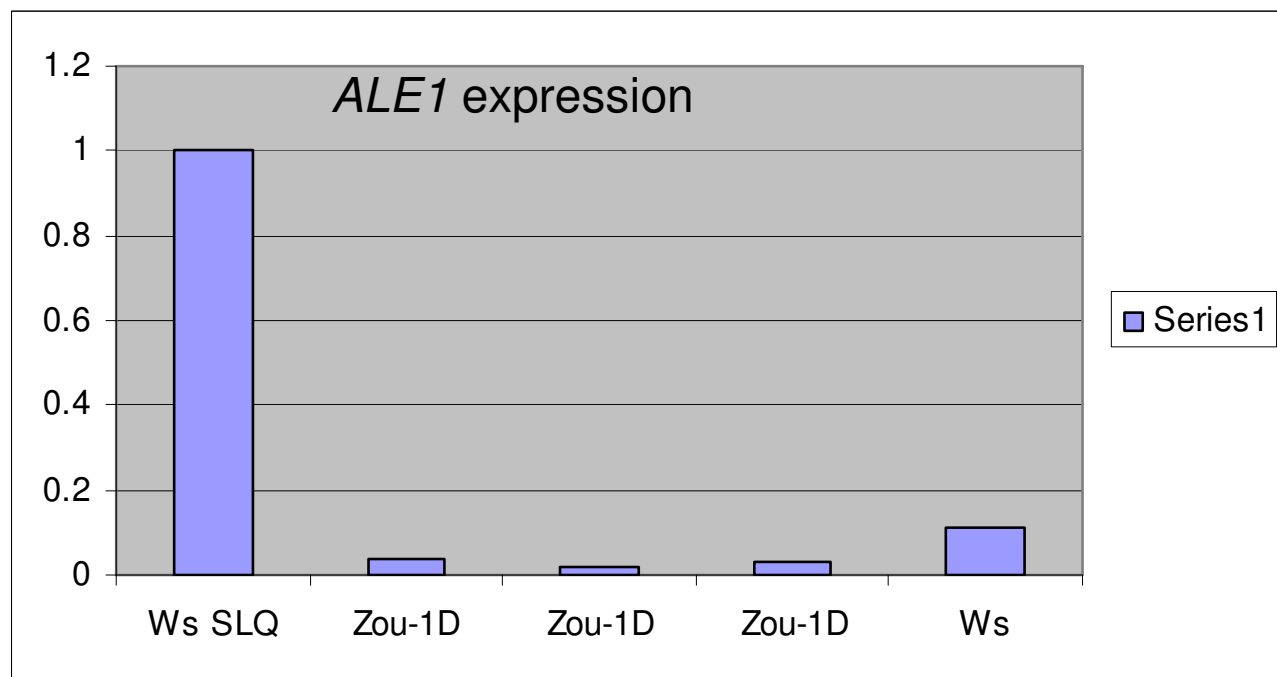**B**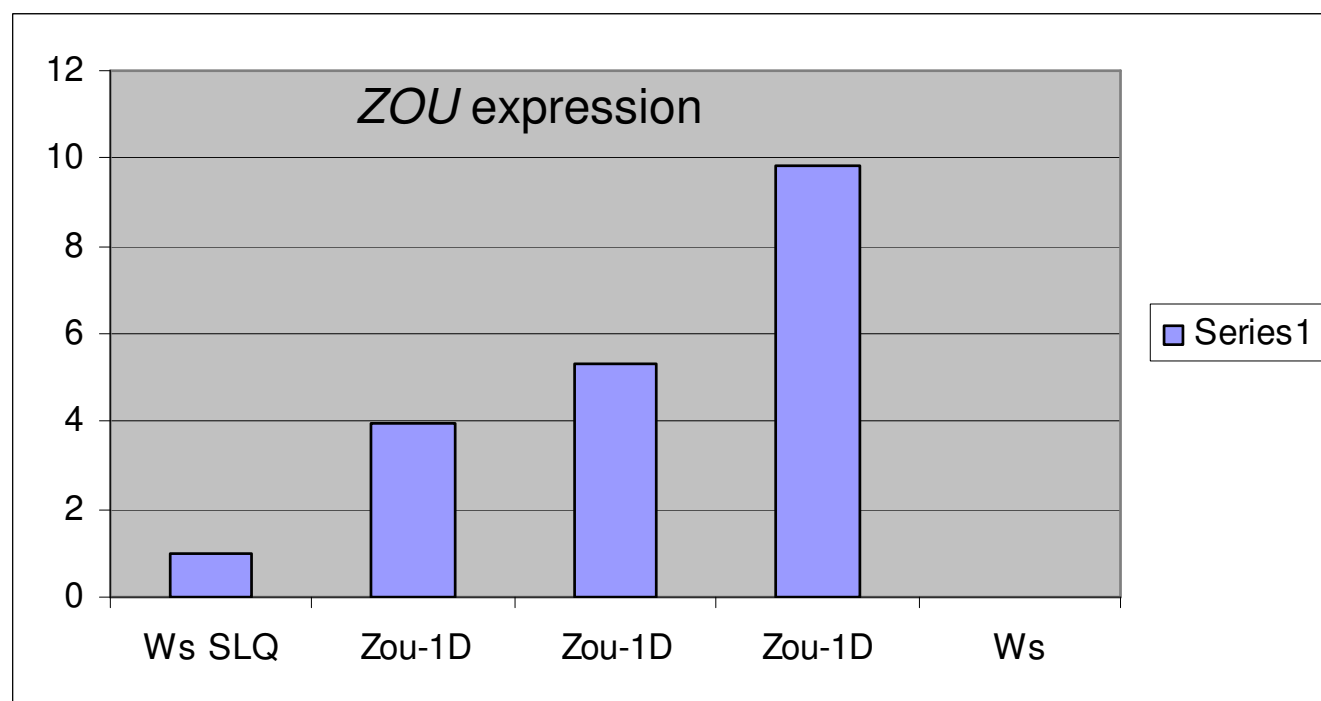

Supplement: dev026708-sup-026708figs5.pdf [file dev026708-sup-026708figs5.pdf]
